# Supplementary material
Source: Springer Nature journal article supplement (https://www.springermedizin.de/resource/supplementary/12990_2009_259_MOESM4_ESM.pdf/9612904)

Mean optical density of py-NR2B

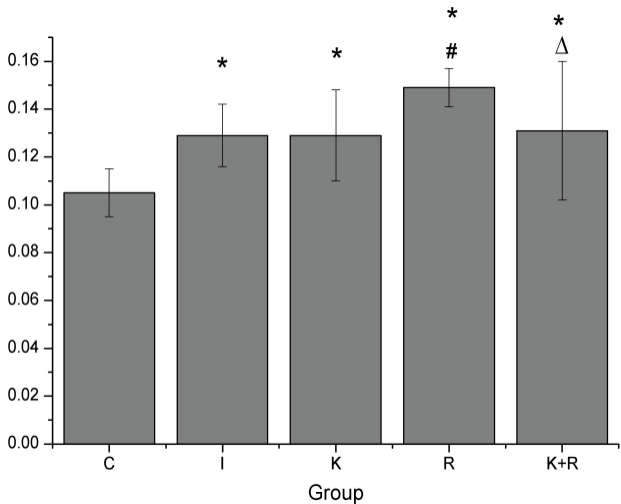

Supplement: MOESM4 [file 9612904]
